# Supplementary material for: Ulcerative Colitis and Acute Severe Ulcerative Colitis Patients Are Overlooked in Infliximab Population Pharmacokinetic Models: Results from a Comprehensive Review
Source: MDPI journal article supplement (doi:10.3390/pharmaceutics14102095), 2022-09-30
Supplement: s1 [file s1]

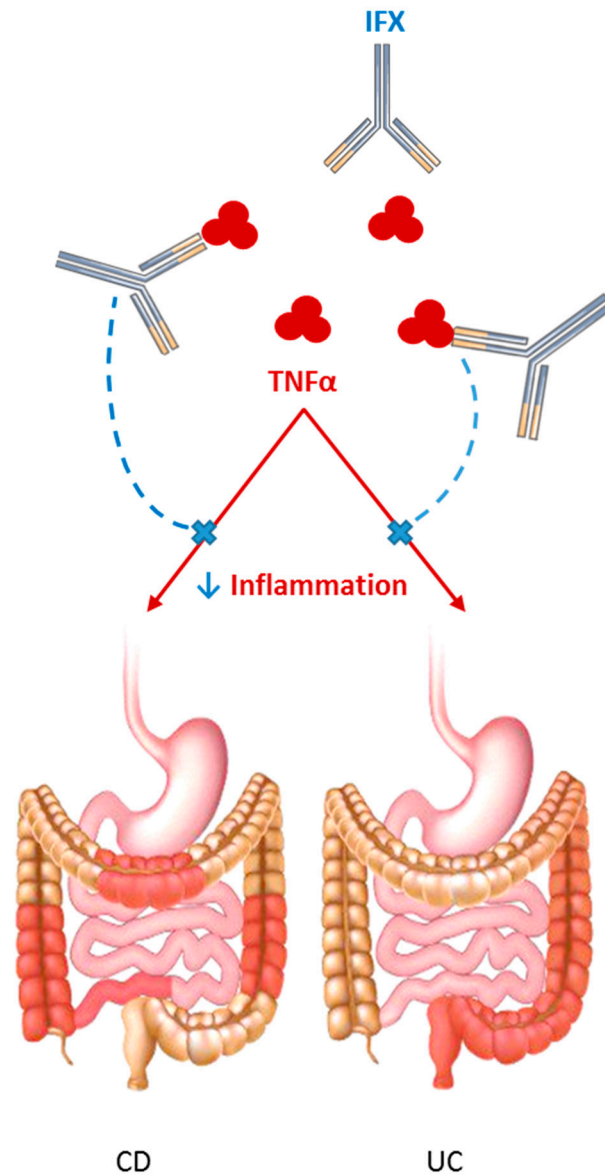

**Figure S1.** Scheme of IFX pharmacological action on TNFα.

Red lines: inflammatory effect; blue lines and cross: inhibition effect of IFX on TNFα.

**Abbreviations:** CD: Crohn's disease; IFX: Infliximab; TNFα: Tumor necrosis factor α; UC: Ulcerative colitis.
