# Supplementary material for: Ulcerative Colitis and Acute Severe Ulcerative Colitis Patients Are Overlooked in Infliximab Population Pharmacokinetic Models: Results from a Comprehensive Review
Source: MDPI journal article supplement (doi:10.3390/pharmaceutics14102095), 2022-09-30
Supplement: s1 [file s1]

Supplementary information

Table S1. Selected Population pharmacokinetic models for infliximab in ulcerative colitis/inflammatory bowel diseases patients.

| Model                         | Structural PK model                         |                    |               |                   | Covariate model          | IIV/IOV model               | Residual error model               | Specified implementation |                       |                         |                |
|-------------------------------|---------------------------------------------|--------------------|---------------|-------------------|--------------------------|-----------------------------|------------------------------------|--------------------------|-----------------------|-------------------------|----------------|
|                               | Parameter estimates (RSE)                   |                    |               |                   | Parameter estimate (RSE) | CV (RSE)                    | Type: parameter estimate (RSE)     | Full model code          | ODEs/ model schematic | Covariate relationships | Random effects |
| <b>Ternant-model (2008)</b>   | <b>2-CMT model, first order elimination</b> |                    |               |                   |                          |                             |                                    | NO                       | NO                    | YES                     | YES            |
| Article                       | CL (L/h)                                    | V1 (L)             | V2 (L)        | Q (L/h)           |                          |                             |                                    |                          |                       |                         |                |
| Ternant (2008) <sup>1</sup>   | ADA-: 0.012 (7.9%)                          | Smen: 2.3 (18.1%)  | 1.0 (22.6%)   | 0.0054 (34.5)     | NA, see structural model |                             | Additive: 1.04 mg/L (12.0%)        |                          |                       |                         |                |
|                               | ADA+: 0.032 (10.9%)                         | women: 1.1 (31.4%) |               |                   |                          | CL ADA-: 22.5%              |                                    |                          |                       |                         |                |
|                               |                                             | WT: 1.7 (19.6%)    |               |                   |                          | CL ADA+: 22.7%              |                                    |                          |                       |                         |                |
|                               |                                             |                    |               |                   |                          | V1 <sub>men</sub> : 14.1%   |                                    |                          |                       |                         |                |
|                               |                                             |                    |               |                   |                          | V1 <sub>women</sub> : 11.3% |                                    |                          |                       |                         |                |
|                               |                                             |                    |               |                   |                          | V1 WT: 1.719.3%             |                                    |                          |                       |                         |                |
|                               |                                             |                    |               |                   |                          | V2: 15%                     |                                    |                          |                       |                         |                |
|                               |                                             |                    |               |                   |                          | Q: 10%                      |                                    |                          |                       |                         |                |
| <b>Fasanmade-model (2009)</b> | <b>2-CMT model, first order elimination</b> |                    |               |                   |                          |                             |                                    | NO                       | NO                    | YES                     | YES            |
| Article                       | CL (L/day)                                  | V1 (L)             | V2 (L)        | Q (L/day)         |                          |                             |                                    |                          |                       |                         |                |
| Fasanmade (2009) <sup>2</sup> | 0.407 L/day (2.5%)                          | 3.29 L (2.1%)      | 4.13 L (3.9%) | 7.14 L/day (6.8%) |                          | CV (RSE)                    | Proportional error: 40.30% (2.6%)  |                          |                       |                         |                |
|                               |                                             |                    |               |                   | ALB~CL: -1.54 (2.5%)     | CL: 37.68% (8.5%)           | Additive error: 0.0413 µg/L (3.5%) |                          |                       |                         |                |

|                                                                               |                                                                      |                                                                |                                                                       |                         |                                                                                                                                                       |                                                                         |                                                                              |    |     |     |     |
|-------------------------------------------------------------------------------|----------------------------------------------------------------------|----------------------------------------------------------------|-----------------------------------------------------------------------|-------------------------|-------------------------------------------------------------------------------------------------------------------------------------------------------|-------------------------------------------------------------------------|------------------------------------------------------------------------------|----|-----|-----|-----|
|                                                                               |                                                                      |                                                                |                                                                       |                         | ADA~CL: 0.471<br>(22.5%)<br>SEX <sub>Female</sub> ~CL: -<br>0.236 (11.9%)<br>WT~V1: 0.538<br>(13.5%)<br>SEX <sub>Female</sub> ~V1: -<br>0.137 (23.2%) | V1: 22.11<br>(16.6%)                                                    |                                                                              |    |     |     |     |
| Vande Casteele<br>(2019) <sup>3</sup>                                         | <i>Fasanmade</i> (2009)                                              |                                                                |                                                                       |                         | <i>Fasanmade</i> (2009)                                                                                                                               | <i>Fasanmade</i><br>(2009)                                              | <i>Fasanmade</i> (2009)                                                      | NO | NO  |     |     |
| Kimura (2019) <sup>4</sup>                                                    | <i>Fasanmade</i> (2009, 2011)                                        |                                                                |                                                                       |                         | <i>Fasanmade</i> (2009,<br>2011)                                                                                                                      | <i>Fasanmade</i><br>(2009, 2011)                                        | <i>Fasanmade</i> (2009,<br>2011)                                             | NO | YES |     |     |
| Kimura (2020) <sup>5</sup>                                                    | CD: 0.353<br>(0.212–<br>0.442)<br><br>UC: 0.450<br>(0.223–<br>0.811) | CD: 2.97<br>(1.96–<br>5.00)<br><br>UC: 2.25<br>(1.60–<br>3.22) | CD:<br>0.137<br>(0.0944–<br>0.273)<br><br>UC: 3.71<br>(3.29–<br>4.06) | CD: 1.22<br>(1.10–1.51) | NA                                                                                                                                                    | NA                                                                      | NA                                                                           | NO | NO  |     |     |
| <b>Fasanmade-model (2011, CD)</b> <b>2-CMT model, first order elimination</b> |                                                                      |                                                                |                                                                       |                         |                                                                                                                                                       |                                                                         |                                                                              | NO | NO  | YES | YES |
| <i>Article</i>                                                                | <i>CL</i><br>(mL/kg/day)                                             | <i>V1</i><br>(mL/kg)                                           | <i>V2</i><br>(mL/kg)                                                  | <i>Q</i> (mL/kg/day)    |                                                                                                                                                       |                                                                         |                                                                              |    |     |     |     |
| <i>Fasanmade</i> (2011) <sup>6</sup>                                          | 5.42 (2.0)                                                           | 52.4 (0.9)                                                     | 19.6 (4.2)                                                            | 2.26 (9.9)              | ALB~CL: –0.855<br>(13.5%)<br>ADA~CL: 0.291<br>(15.2%)<br><br>IMM~CL: –0.137<br>(20.5%)<br>WT~CL: –0.313<br>(14.6%)<br>WT~V1: –0.233<br>(12.3%)        | CL: 30.7%<br>(8.1%)<br>V1: 12.6%<br>(19.2%)<br><br>V2: 55.3%<br>(18.5%) | Proportional error:<br>29.2% (2.7)<br>Additive error: 0.371<br>µg/mL (18.3%) |    |     |     |     |



|                                    |                  |                 |                 |              |                                                                                                                                |                                                                                   |                                |    |    |
|------------------------------------|------------------|-----------------|-----------------|--------------|--------------------------------------------------------------------------------------------------------------------------------|-----------------------------------------------------------------------------------|--------------------------------|----|----|
| Dubinsky (2017) <sup>11</sup>      | Xu (2012)        |                 |                 |              | Xu (2012)                                                                                                                      | Xu (2012)                                                                         | Xu (2012)                      | NO | NO |
| Wojciechowski (2017) <sup>12</sup> | Xu (2012)        |                 |                 |              | Xu (2012)                                                                                                                      | Xu (2012)                                                                         | Xu (2012)                      | NO |    |
| Eser (2018) <sup>13</sup>          |                  |                 |                 |              |                                                                                                                                |                                                                                   |                                | NO | NO |
| Model 1                            | 0.246<br>(10.1%) | 4 (20.1%)       | 2.34<br>(28.8%) | 0.07 (20.5%) | WT~CL: 1.59<br>(20.1%)<br>ALB~CL: -1.45<br>(27.7%)<br>ADA~CL: 0.44<br>(23%)<br>WT~V1: 2.16<br>(28.6%)<br>WT~V2: NE<br>WT~Q: NE | CL: 33.02%<br>(33.1%)<br>V1: 40.12%<br>(58.7%)<br>V2: 122.07%<br>(40.3%)<br>Q: NE | Proportional: 53.10%<br>(5.1%) |    |    |
| Model 2                            | 0.28 (NE)        | 3.16<br>(NE)    | 0.477<br>(NE)   | 0.04 (NE)    | WT~CL: 1.56<br>(NE)<br>ALB~CL: -0.763<br>(NE)<br>ADA~CL: 0.76<br>(NE)<br>WT~V1: 2.25 (NE)<br>WT~V2: NE<br>WT~Q: NE             | CL: 24.04%<br>(NE)<br>V1: 56.66%<br>(NE)<br>V2: 81.30%<br>(NE)<br>Q: NE           | Proportional: 54.40%<br>(NE)   |    |    |
| Model 3                            | 0.243<br>(7.7%)  | 4.04<br>(13.2%) | 3.02<br>(52.3%) | 0.03 (24.4%) | WT~CL: 0.921<br>(29%)<br>ALB~CL: -1.24<br>(28.1%)<br>ADA~CL: 1.11<br>(13.5%)<br>WT~V1: 1.12(41.3%)<br>WT~V2: NE<br>WT~Q: NE    | CL:25.10%<br>(47.5%)<br>V1: 49.80%<br>(32.6%)<br>V2: 92.47%<br>(68.1%)<br>Q: NE   | Proportional: 56.70%<br>(4.7%) |    |    |

|                               |                                             |               |               |                  |                                                                                                                                       |                                                                           |                                                          |    |    |     |     |
|-------------------------------|---------------------------------------------|---------------|---------------|------------------|---------------------------------------------------------------------------------------------------------------------------------------|---------------------------------------------------------------------------|----------------------------------------------------------|----|----|-----|-----|
| Dubinsky (2022) <sup>14</sup> | Xu (2012)                                   |               |               |                  | Xu (2012)                                                                                                                             | Xu (2012)                                                                 | Xu (2012)                                                | NO | NO |     |     |
| <b>Dotan-model (2014)</b>     | <b>2-CMT model, first order elimination</b> |               |               |                  |                                                                                                                                       |                                                                           |                                                          | NO | NO | YES | YES |
| <i>Article</i>                | <i>CL (L/day)</i>                           | <i>V1 (L)</i> | <i>V2 (L)</i> | <i>Q (L/day)</i> |                                                                                                                                       |                                                                           |                                                          |    |    |     |     |
| Dotan (2014) <sup>15</sup>    | 0.381 (0.5%)                                | 2.37 (0.2%)   | 1.37 (0.4%)   | 0.122 (0.4%)     | WT~CL: 0.612 (2.1%)<br>ALB~CL: -1.39 (1.5%)<br>ADA~CL: 1.59 (13%)<br>WT~V1: 0.696 (1.9%)<br>WT~Q: 1.15 (3.6%)<br>WT~V2: 0.604 (10.2%) | CL: 13.45 (4%)<br>V1: 42.07 (1.5%)<br>V2: 32.40 (1.7%)<br>Q: 85.15 (1.2%) | NR                                                       |    |    |     |     |
| <b>Buurman-model (2015)</b>   | <b>2-CMT model, first order elimination</b> |               |               |                  |                                                                                                                                       |                                                                           |                                                          | NO | NO | YES | NO  |
| <i>Article</i>                | <i>CL (L/day)</i>                           | <i>V1 (L)</i> | <i>V2 (L)</i> | <i>Q (L/day)</i> |                                                                                                                                       |                                                                           |                                                          |    |    |     |     |
| Buurman (2015) <sup>16</sup>  | 0.199 (6%)                                  | 4.94 (10%)    | 3.13 (32%)    | 0.0618 (23%)     | Period~CL: +40% (11%)<br>ADA~CL: +72% (35%)<br>SEX <sub>male</sub> ~CL: +35% (34%)<br>HBI~V1: -3.6% (28%)                             | CL: 18% (18%)<br>V1: 17.1% (31%)                                          | Proportional: 21.7% (30%)<br>Additional: 0.98 mg/L (18%) |    |    |     |     |
| <b>Passot-model (2016)</b>    | <b>1-CMT model, first order elimination</b> |               |               |                  |                                                                                                                                       |                                                                           |                                                          | NO | NO | YES | YES |
| <i>Article</i>                | <i>CL (L/day)</i>                           | <i>V1 (L)</i> |               |                  |                                                                                                                                       |                                                                           |                                                          |    |    |     |     |
| Passot (2016) <sup>17</sup>   | 0.23 (4%)                                   | 5.2 (4%)      |               |                  | SEX <sub>Male</sub> ~V: 0.209 (45%)<br>Age <sub>&lt;=15</sub> ~V: -0.396 (37%)                                                        | V: 0.224 (12%)<br>CL: 0.304 (7%)                                          | Proportional: 0.223 (7%)<br>Additional: 0.72 mg/L (19%)  |    |    |     |     |

CD~V: 0.399  
(17%)  
WT~CL: 0.603  
(18%)  
SEX<sub>Male</sub>~CL: 0.181  
(30%)  
CD on CL: 0.384  
(15%)  
UC~CL: 0.472  
(21%)  
RA~CL: 0.392  
(32%)  
MTX~CL: -0.336  
(52%)

| Brandse-model<br>(2017)      | 2-CMT model, first order elimination |               |                |              |                                                         |                      |                                  |  | NO | N  | NO | NO |
|------------------------------|--------------------------------------|---------------|----------------|--------------|---------------------------------------------------------|----------------------|----------------------------------|--|----|----|----|----|
| Article                      | CL<br>(L/day)                        | V1 (L)        | V2 (L)         | Q (L/day)    |                                                         |                      |                                  |  |    |    |    |    |
| Brandse (2017) <sup>18</sup> | 0.358                                | 4.72          | 2.4            | 0.0697       | WT~CL: 0.523                                            | CL: 38.1%            | NR                               |  |    |    |    |    |
|                              |                                      |               |                |              | ALB~CL: -1.38                                           | V1: 68.6%            |                                  |  |    |    |    |    |
|                              |                                      |               |                |              | Previous exposure ~CL: 0.0521                           | V2: 71.7%            |                                  |  |    |    |    |    |
|                              |                                      |               |                |              | ADA~CL: 0.601                                           | Q: 58.1%             |                                  |  |    |    |    |    |
|                              |                                      |               |                |              | WT~V <sub>c</sub> : 0.473                               |                      |                                  |  |    |    |    |    |
|                              |                                      |               |                |              | WT~Q: 0.523                                             |                      |                                  |  |    |    |    |    |
|                              |                                      |               |                |              | WT~V <sub>p</sub> : 0.473                               |                      |                                  |  |    |    |    |    |
| Kevans-model<br>(2018)       | 2-CMT model, time varying CL         |               |                |              |                                                         |                      |                                  |  | NO | NO | NO | NO |
| Article                      | CL<br>(L/day)                        | V1 (L)        | V2 (L)         | Q (L/day)    |                                                         |                      |                                  |  |    |    |    |    |
| Kevans (2018) <sup>19</sup>  | 0.368<br>(0.5%)                      | 3.3<br>(0.2%) | 3.42<br>(0.5%) | 0.308 (0.1%) | rate constant of CL increase with ADA: 0.138<br>(25.5%) | CL: 50.10%<br>(1.2%) | Proportional error: 28.5% (0.3%) |  |    |    |    |    |

Time dependent CL:  
0.105 (0.4%)

WT~CL: 0.709 (0%)  
V1: 35.92% (0.8%)  
ALB~CL: -0.445 (2.6%)  
V2: 75.70% (0.8%)  
ADA~CL: -0.0373 (4.9%)  
Q: 55.14% (0.4%)  
WT~V1: 0.64 (0%)  
WT~V2: 0.991 (0%)  
WT~Q: 1.52 (0%)

| Petitcollin-model (2019)         | 1-CMT model, time varying CL         |                    |             | logit-risk model of immunization           |                                                                                                                            |                                                                                                                                             |                                                       | NO                                                            | NO  | YES | YES |
|----------------------------------|--------------------------------------|--------------------|-------------|--------------------------------------------|----------------------------------------------------------------------------------------------------------------------------|---------------------------------------------------------------------------------------------------------------------------------------------|-------------------------------------------------------|---------------------------------------------------------------|-----|-----|-----|
| Article                          | CL <sub>base</sub> (L/day)           | Slope (L/day/year) | V1 (L)      | CLvar 1 FIX                                | UC~CL: 0.377 (29%)                                                                                                         | V: 25.4% (15%)                                                                                                                              | Proportional: 20.6% (6%)                              |                                                               |     |     |     |
| Petitcollin (2019) <sup>20</sup> | 0.273 (7%)                           | 0.0348 (9%)        | 11.5 (5%)   | intercept: 10.9 (5%)<br>Beta: 0.0526 (21%) | Dose~CL: -0.267 (22%)<br>CRP~CL: 0.0654 (15%)<br>Mayo score~CL: 0.0934 (30%)<br>AZA~CL: 0.849 (2%)<br>WT~Slope: 31.1 (31%) | CL <sub>base</sub> : 44.3% (10%)<br>$\beta_{dose}$ : 33.3% (19%)<br>slope: 32% (26%)<br>beta: 102% (17%)<br>CL <sub>var</sub> : 44.4% (11%) | Additional: 0.446 ug/mL (22%)                         |                                                               |     |     |     |
| Berends-model (2019)             | 2-CMT model, first order elimination |                    |             |                                            | TMDD model                                                                                                                 |                                                                                                                                             |                                                       | YES                                                           | YES | YES | YES |
| Article                          | CL (L/day)                           | V1 (L)             | V2 (L)      | Q (L/day)                                  | Bmax : 0.38 pM (20%)<br>Bmax : 19.8 pg/mL (-)<br>Kss : 14 nM (24%)                                                         | ADA~CL: 2.15 (12%)<br>ALB~CL: -1.13 (36%)                                                                                                   | CL: 29.2% (19%)<br>V1: 22.7% (16%)<br>V2: 74.2% (19%) | Proportional IFX: 0.210 (13%)<br>Proportional TNF: 0.406 (9%) |     |     |     |
| Berends (2019) <sup>21</sup>     | 0.404 (9.9%)                         | 3.18 (9.1%)        | 1.64 (6.3%) | 0.344 (20%)                                |                                                                                                                            |                                                                                                                                             |                                                       |                                                               |     |     |     |





|                             |                                      |           |                |            |               |              |                                                                                                                                               |                                                                                                                                                                                                                                                                                                      |                                                                               |  |    |     |     |     |
|-----------------------------|--------------------------------------|-----------|----------------|------------|---------------|--------------|-----------------------------------------------------------------------------------------------------------------------------------------------|------------------------------------------------------------------------------------------------------------------------------------------------------------------------------------------------------------------------------------------------------------------------------------------------------|-------------------------------------------------------------------------------|--|----|-----|-----|-----|
| Hanzel (2021) <sup>24</sup> | 0.355<br>(2%)                        | 3.10 (3%) | 1.93<br>(2%)   | 0.598 (4%) | 0.273<br>(8%) | 79.1<br>(3%) | ALB~CL: -0.826<br>(11%)<br>BW~CL: 0.666<br>(15%)<br>ADA~CL: 1,39<br>(3%)<br>BW~V1: 0.385<br>(34%)<br>BW~V2: 1.08 (9%)<br><br>BW~Q: 1.26 (15%) | CL: 27.7%<br>(14%)<br>V1: 21.4%<br>(21%)<br>ka 48.5%<br>(45%)<br>F1: 16.4%<br>(15%)<br>CL-<br>V1:0.028%<br>(31.4%)<br>CL-ka: -<br>0.046%<br>(53.2%)<br>CL-F1: -<br>0.013%<br>(42.2%)<br>V1-ka: -<br>0.069% (47%)<br>V1-F1:<br>0.00008%<br>(744%)<br>ka-F1: 0.003%<br>(413%)<br>IOV CL:<br>17.5% (6%) | Proportional: 0.102<br>(2%)<br>Additional: 1.66 (3%)<br>ug/mL                 |  |    |     |     |     |
| Grisic-model<br>(2021)      | 2-CMT model, first order elimination |           |                |            |               |              |                                                                                                                                               |                                                                                                                                                                                                                                                                                                      |                                                                               |  | NO | YES | YES | YES |
|                             | CL (L/h)                             | V1 (L)    | V2 (L)         | Q (L/h)    |               |              |                                                                                                                                               |                                                                                                                                                                                                                                                                                                      |                                                                               |  |    |     |     |     |
| Grisic (2021) <sup>25</sup> | 0.0109<br>(3%)                       | 3.67 (-)  | 0.956<br>(11%) | 0.0067 (-) |               |              | ALB~CL: -1.17<br>(21%)<br>ADA~CL: 0.972<br>(4%)<br>IMM~CL: 0.847<br>(5%)<br>WT~CL:0.356<br>(41%)                                              | CL: 34.9%<br>(8%)<br>V1: 12.8% (-)<br><br>V2: 55.3% (-)                                                                                                                                                                                                                                              | Proportional error:<br>24% (14%)<br>Additive error (SD):<br>0.478 (21%) µg/mL |  |    |     |     |     |

ADA: Anti-drug antibodies; ADA<sub>cat</sub>: Categorical ADA; Add: additional residual variability; ALB: Albumin concentrations; AZA: Azathioprine; B<sub>maxTNF</sub>: Baseline TNF concentration; BW: Body weight; CD: Crohn's disease; CL: Clearance; CL<sub>base</sub>: Baseline clearance; CL<sub>time</sub>: Time dependant CL; CMT: Compartment; CORT: Corticosteroids; CRP: C-Reactive protein; F: Bioavailability; FFM: Free fat mass; HBI: Harvey-Bradshaw index; IFX: Infliximab; IIV: Interindividual variability; IMM: Immunomodulators; IOV: Interoccasion variability; ka: Absorption rate constant; K<sub>ss,TNF-IFX</sub>: Steady-state equilibrium constant; K<sub>deg,TNF</sub>: Degradation constant TNF receptor; ke: elimination rate constant; ke(p),TNF-IFX: Internalisation rate complex; MTX: Methotrexate; NR: Not reported; ODE: Ordinary differential equation; Prop: Proportional residual variability; Q: Inter-compartmental clearance; V1: Central volume of distribution; V2: Peripheral volume of distribution; RA: Rheumatoid arthritis; s.c.: subcutaneous; SD: Standard deviation; TMDD: Target mediated drug disposition; TNF: Tumour necrosis factor; UC: Ulcerative colitis; WT: Weight; y.o.: Years old.

## References

1. Ternant, D. *et al.* Infliximab Pharmacokinetics in Inflammatory Bowel Disease Patients. *Therapeutic Drug Monitoring* **30**, (2008).
2. Fasanmade, A. A. *et al.* Population pharmacokinetic analysis of infliximab in patients with ulcerative colitis. *European Journal of Clinical Pharmacology* **65**, 1211–1228 (2009).
3. vande Casteele, N., Jeyarajah, J., Jairath, V., Feagan, B. G. & Sandborn, W. J. Infliximab Exposure-Response Relationship and Thresholds Associated With Endoscopic Healing in Patients With Ulcerative Colitis. *Clinical Gastroenterology and Hepatology* **17**, 1814-1821.e1 (2019).
4. Kimura, K., Yoshida, A., Katagiri, F., Takayanagi, R. & Yamada, Y. Prediction of clinical effects of infliximab administered for inflammatory bowel disease based on pharmacokinetic and pharmacodynamic modeling. *Biopharmaceutics & Drug Disposition* **40**, 250–261 (2019).
5. Kimura, K., Yoshida, A., Katagiri, F., Takayanagi, R. & Yamada, Y. Prediction of treatment failure during infliximab induction therapy in inflammatory bowel disease patients based on pharmacokinetic and pharmacodynamic modeling. *European Journal of Pharmaceutical Sciences* **150**, 105317 (2020).
6. Fasanmade, A. A., Adedokun, O. J., Blank, M., Zhou, H. & Davis, H. M. Pharmacokinetic Properties of Infliximab in Children and Adults with Crohn's Disease: A Retrospective Analysis of Data from 2 Phase III Clinical Trials. *Clinical Therapeutics* **33**, 946–964 (2011).
7. Santacana, E. *et al.* External evaluation of population pharmacokinetic models of infliximab in patients with inflammatory bowel disease. *Therapeutic Drug Monitoring* **40**, 120–129 (2018).

8. Gil Candel, M. *et al.* Usefulness of population pharmacokinetics to optimize the dosage regimen of infliximab in inflammatory bowel disease patients. *Revista espanola de enfermedades digestivas : organo oficial de la Sociedad Espanola de Patologia Digestiva* **112**, 590–597 (2020).
9. Santacana Juncosa, E. *et al.* Bayes-based dosing of infliximab in inflammatory bowel diseases: Short-term efficacy. *British Journal of Clinical Pharmacology* 1–12 (2020) doi:10.1111/bcp.14410.
10. Bauman, L. E. *et al.* Improved Population Pharmacokinetic Model for Predicting Optimized Infliximab Exposure in Pediatric Inflammatory Bowel Disease. *Inflammatory Bowel Diseases* **26**, 429–439 (2020).
11. Dubinsky, M. C., Phan, B. L., Singh, N., Rabizadeh, S. & Mould, D. R. Pharmacokinetic Dashboard-Recommended Dosing Is Different than Standard of Care Dosing in Infliximab-Treated Pediatric IBD Patients. *AAPS Journal* **19**, 215–222 (2017).
12. Wojciechowski, J., Upton, R. N., Mould, D. R., Wiese, M. D. & Foster, D. J. R. Infliximab Maintenance Dosing in Inflammatory Bowel Disease: an Example for In Silico Assessment of Adaptive Dosing Strategies. *The AAPS Journal* **19**, 1136–1147 (2017).
13. Eser, A. *et al.* Prediction of Individual Serum Infliximab Concentrations in Inflammatory Bowel Disease by a Bayesian Dashboard System. *Journal of Clinical Pharmacology* **58**, 790–802 (2018).
14. Dubinsky, M. C. *et al.* Dashboard-Driven Accelerated Infliximab Induction Dosing Increases Infliximab Durability and Reduces Immunogenicity. *Inflamm Bowel Dis* (2022) doi:10.1093/IBD/IZAB285.
15. Dotan, I. *et al.* Patient factors that increase infliximab clearance and shorten half-life in inflammatory bowel disease: A population pharmacokinetic study. *Inflammatory Bowel Diseases* **20**, 2247–2259 (2014).
16. Buurman, D. J., Maurer, J. M., Keizer, R. J., Kosterink, J. G. W. & Dijkstra, G. Population pharmacokinetics of infliximab in patients with inflammatory bowel disease: Potential implications for dosing in clinical practice. *Alimentary Pharmacology and Therapeutics* **42**, 529–539 (2015).
17. Passot, C. *et al.* The underlying inflammatory chronic disease influences infliximab pharmacokinetics. *MAbs* **8**, 1407–1416 (2016).
18. Brandse, J. F. *et al.* A Real-life Population Pharmacokinetic Study Reveals Factors Associated with Clearance and Immunogenicity of Infliximab in Inflammatory Bowel Disease. *Inflammatory Bowel Diseases* **23**, 650–660 (2017).

19. Kevans, D., Murthy, S., Mould, D. R. & Silverberg, M. S. Accelerated clearance of infliximab is associated with treatment failure in patients with corticosteroid-refractory acute ulcerative colitis. *Journal of Crohn's and Colitis* **12**, 662–669 (2018).
20. Petitcollin, A. *et al.* Pharmacokinetic Parameters of Infliximab Influence the Rate of Relapse After De-Escalation in Adults With Inflammatory Bowel Diseases. *Clinical Pharmacology and Therapeutics* **106**, 605–615 (2019).
21. Berends, S. E. *et al.* Tumor necrosis factor-mediated disposition of infliximab in ulcerative colitis patients. *Journal of Pharmacokinetics and Pharmacodynamics* **46**, 543 (2019).
22. Dreesen, E. *et al.* Optimising infliximab induction dosing for patients with ulcerative colitis. *British Journal of Clinical Pharmacology* **85**, 782–795 (2019).
23. Faelens, R. *et al.* Model-informed precision dosing during infliximab induction therapy reduces variability in exposure and endoscopic improvement between patients with ulcerative colitis. *Pharmaceutics* **13**, (2021).
24. Hanzel, J., Bukkems, L. H., Gecse, K. B., D'Haens, G. R. & Mathôt, R. A. A. Population pharmacokinetics of subcutaneous infliximab CT-P13 in Crohn's disease and ulcerative colitis. *Aliment Pharmacol Ther* **54**, 1309–1319 (2021).
25. Griscic, A. M., Eser, A., Huisinga, W., Reinisch, W. & Kloft, C. Quantitative relationship between infliximab exposure and inhibition of C-reactive protein synthesis to support inflammatory bowel disease management. *British Journal of Clinical Pharmacology* **87**, 2374–2384 (2021).
